# Supplementary material for: Disdrometer measurements under Sense-City rainfall simulator
Source: Copernicus journal article supplement (doi:10.5194/essd-2019-130), 2019-08-13
Supplement: Supplementary file [file essd-2019-130-AC1-supplement.pdf]

Interactive comment on “Disdrometer measurements under Sense-City rainfall simulator” by Auguste Gires et al.

Anonymous Referee #1

Received and published: 31 October 2019

Authors would like to thank the reviewer for its feedback that helped improving the paper. Hopefully, the modifications implemented will satisfy her/him.

General comments:

The paper showed data base of raindrops measured by two OTT Parsivel2 in Sense-City rainfall simulator. The protocol to show data in the mixture of html and python-formatted data has good visibility. I accept this paper to be published in this journal.

Thank you for positive feedback !

Detailed comments:

The quick look figures show drop data with diameter  $<9$  mm and velocity  $<12$  m/s, however, Parsivel measures larger diameter and higher velocity show in Table 1. The paper should describe how and why they are not shown.

This sentence was added to the text in section 3.1 to clarify what was done :

“It should be mentioned that only drops with a diameter smaller than 9 mm and a velocity smaller than 12  $\text{m.s}^{-1}$  are displayed while larger and faster hydrometeors can be computed (see Table [\ref{tab:classes\\_parsivel}](#)). This range adapted to the typical features of rain drops was chosen to improve visibility of the figure. The data provided contains all the information (actually in this case no drops outside of the display range).”

P5 L4-5. The texts “The rainfall simulator, with its two separate networks for light and heavy rainfall was highlighted in yellow.” should be in the figure caption.

Following the reviewer’s comment, the sentence was also included in the caption.

Figures 2 and 3. Add positions of nozzles and line of nozzles in the diagram. It is useful for readers how is rainfall applied.

The nozzles are distributed for the heavy rain over two separate lines of length 8.03 m split by 1.44 m. The nozzles are distributed for the light rain over two other separate lines of length 8.03 m split by 1.56 m. As suggestion by the reviewer, the positions of nozzles and line of nozzles are now displayed in Fig. 2 and 3.
